# Supplementary material for: Polythioethers bearing side groups for efficient degradation by E1cB reaction: reaction design for polymerization and main-chain scission
Source: Royal Society of Chemistry journal article supplement (doi:10.1039/d3ra03751g), 2023-01-01
Supplement: d3ra03751g1.pdf [file d3ra03751g1.pdf]

## Polythioethers Bearing Side Groups for Efficient Degradation by E1cB Reaction: Reaction Design for Polymerization and Main-Chain Scission

Ryo Kawatani,<sup>a</sup> Keito Hagiwara,<sup>a</sup> Anri Tanaka<sup>a</sup> and Yasuhiro Kohsaka<sup>a,b\*</sup>

<sup>a</sup> Faculty of Textile Science and Technology, Shinshu University, 3-15-1 Tokida, Ueda, Nagano386-8567, Japan. Email: kohsaka@shinshu-u.ac.jp

<sup>b</sup> Research Initiative for Supra-Materials (RISM), Interdisciplinary Cluster for Cutting Edge Research (ICCER), Shinshu University.

### Electric Supplementary Information

#### Instruments

<sup>1</sup>H and <sup>13</sup>C NMR spectra were recorded in CDCl<sub>3</sub> (Kanto Chemical) and CD<sub>3</sub>CN (Kanto Chemical) on AVANCE NEO (Bruker) spectrometers. Chemical shifts in <sup>1</sup>H and <sup>13</sup>C NMR spectra were referred to the signal of tetramethylsilane (TMS) and solvent (CDCl<sub>3</sub>), respectively. Molecular weight and its distributions were determined at 40 °C by size-exclusion chromatography (SEC) on an EXTREMA chromatograph (JASCO) equipped with two SEC columns [Shodex HK-404L×2], using tetrahydrofuran (THF containing 3,5-di-*tert*-butyl-4-hydroxy-toluene, Wako Pure Chemical Industries, for HPLC grade) as an eluent (flow rate = 0.6 mL min<sup>-1</sup>), and calibrated against standard polystyrene (PS) samples (TSK-gel oligomer kit, Tosoh,  $M_n$ : 1.03 × 10<sup>6</sup>, 3.89 × 10<sup>5</sup>, 1.82 × 10<sup>5</sup>, 3.68 × 10<sup>4</sup>, 1.36 × 10<sup>4</sup>, 5.32 × 10<sup>3</sup>, 3.03 × 10<sup>3</sup>, 8.73 × 10<sup>2</sup>) and detected with UV (UV-4070, JASCO) and RI (RI-4035, JASCO) detectors.

#### Materials

Methyl acrylate, acetaldehyde, 1,4-diazabicyclo[2.2.2]octane (DABCO), 1,10-decanedithiol, benzyl mercaptan were purchased from Tokyo Chemical Industry Co., Ltd. Sodium sulfate (Na<sub>2</sub>SO<sub>4</sub>), pyridine, hexane, ethyl acetate (EtOAc), chloroform (CHCl<sub>3</sub>), dichloromethane (CH<sub>2</sub>Cl<sub>2</sub>), tetrahydrofuran (THF), acetonitrile (CH<sub>3</sub>CN), toluene, *N,N*-dimethylformamide (DMF), dimethyl sulfoxide (DMSO), 1,4-dioxane, methanol (MeOH), hydrochromic acid (HCl aq.), 1,8-diazabicyclo[5.4.0.]undec-7-ene, Et<sub>3</sub>N, and *i*PrNEt were purchased from Fujifilm Wako Pure Chemical Industries, Ltd. Benzoyl chloride was kind gift from Iharanikkei Chemical Industry Co., Ltds.

#### Synthesis

**Methyl 2-(1-hydroxyethyl)acrylate (13b):**<sup>1</sup> Methyl acrylate (25.8 g, 300 mmol) and 1,8-diazabicyclo[2.2.2]octane (11.2 g, 100 mmol) were added to a solution of acetaldehyde (4.41 g, 100 mmol) in a cosolvent of 1,4-dioxane and H<sub>2</sub>O (v/v = 1/1) at 25 °C. After 24 h, the mixture was extracted with CH<sub>2</sub>Cl<sub>2</sub> (100 mL × 2). The combined organic layer was washed with brine (100 mL) and dried over Na<sub>2</sub>SO<sub>4</sub>. The organic layer was concentrated to yield a crude **13b** (6.06 g, yield: 46.2%). The obtained **13b** was used in the next reaction without further purification.

<sup>1</sup>H NMR spectrum (400 MHz, CDCl<sub>3</sub>, 25 °C): δ/ppm 6.22 (1H, s, CH), 5.83 (1H, s, CH=), 4.63 (1H, quin, *J* = 6.50 Hz, CH), 3.80 (3H, s, OCH<sub>3</sub>), 2.70 (1H, d, *J* = 5.44 Hz, OH), 1.39 (3H, d, *J* = 6.50 Hz, CCH<sub>3</sub>)

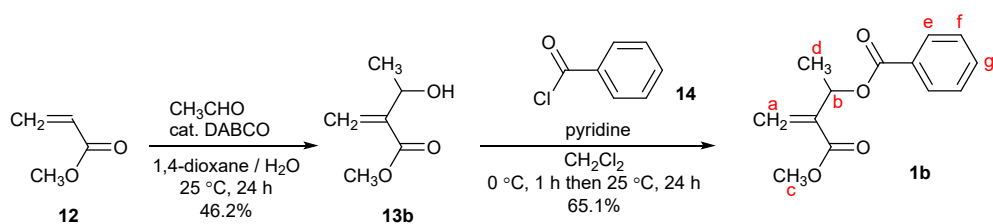

Scheme S1. Preparation of **1b**.

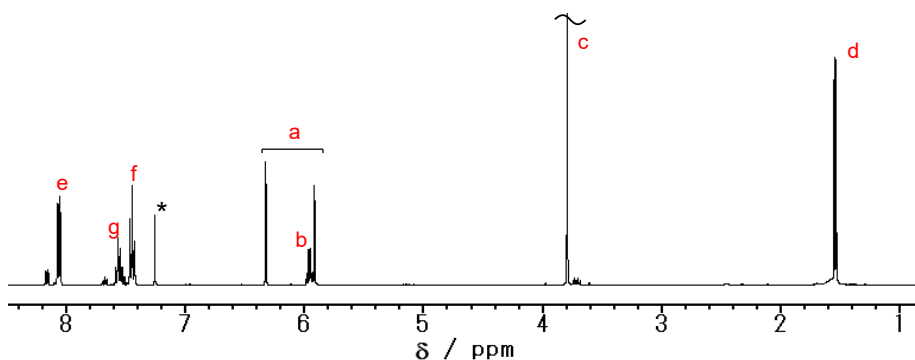

Fig. S1.  $^1\text{H}$  NMR spectrum of **1b** (400 MHz,  $\text{CDCl}_3$ , 25 °C). Labels for assignments are corresponding to Scheme 1.

**Methyl 2-(1-benzoyloxyethyl)acrylate (1b):**<sup>1</sup> Pyridine (4.35 g, 55.0 mmol) was added to a solution of **1b** (6.51 g, 50.0 mmol) in  $\text{CH}_2\text{Cl}_2$  (80 mL) at 0 °C. After 10 min, the solution of benzoyl chloride (9.14 g, 65.0 mmol) in  $\text{CH}_2\text{Cl}_2$  (20 mL) was added dropwise to the mixture at 0 °C. After 1 h, the mixture was stirred at room temperature for 24 h. Then,  $\text{H}_2\text{O}$  (100 mL) was added at 0 °C, and the organic layer was collected. The aqueous layer was extracted with  $\text{CH}_2\text{Cl}_2$  (50 mL  $\times$  2). The combined organic layers were washed with  $\text{H}_2\text{O}$  (100 mL) and brine (150 mL), dried over  $\text{Na}_2\text{SO}_4$  and concentrated to yield crude **1b**. The crude product was purified by distillation under reduced pressure using a glass tube oven (Kugel Rohr, 10 Torr/170 °C, 7.62g, 65.1%).

$^1\text{H}$  NMR spectrum (400 MHz,  $\text{CDCl}_3$ , 25 °C):  $\delta$ /ppm 8.07 (2H, d,  $J = 7.63$  Hz, CH), 7.59-7.53 (1H, m, CH), 7.45 (2H, t,  $J = 7.63$  Hz, CH), 6.33 (1H, s, CH=), 5.96 (1H, q,  $J = 6.53$  Hz,  $\text{CHCH}_3$ ), 5.29 (1H, s, CH=), 3.80 (3H, s,  $\text{OCH}_3$ ), 1.55 (3H, d,  $J = 6.53$  Hz,  $\text{CCH}_3$ )

**Methyl 2-(hydroxy(phenylmethyl))acrylate (13c):** Methyl acrylate (25.8 g, 300 mmol) and 1,8-diazabicyclo[2.2.2]octane (6.50 g, 57.9 mmol) were added to a solution of benzaldehyde (31.8 g, 300 mmol) in cosolvent of 1,4-dioxane and  $\text{H}_2\text{O}$  (v/v = 1/1, 10 mL) at 25 °C. After 24 h,  $\text{H}_2\text{O}$  (150 mL) was added, and the mixture was extracted with  $\text{CH}_2\text{Cl}_2$  (150 mL  $\times$  2). The organic layer was washed with brine (100 mL), dried over  $\text{Na}_2\text{SO}_4$ , concentrated and washed with hexane to yield a crude **13c** (17.8 g, yield: 30.9%). The obtained **13c** was used in the next reaction without further purification.

$^1\text{H}$  NMR spectrum (400 MHz,  $\text{CDCl}_3$ , 25 °C):  $\delta$ /ppm 7.40-7.33 (4H, m), 7.31-7.26 (1H, m), 6.34 (1H, s, CH=), 5.83 (1H, t,  $J = 1.22$  Hz, CH=), 5.57 (1H,  $J = 5.73$  Hz,  $\text{CHOH}$ ), 3.73 (3H, s,  $\text{OCH}_3$ ), 2.99 (1H, d,  $J = 5.73$  Hz, OH)

**Methyl 2-(benzoyloxy(phenylmethyl))acrylate (1c):** Pyridine (5.14 g, 65.0 mmol) was added to a solution of **13c** (9.61 g, 50 mmol) in  $\text{CH}_2\text{Cl}_2$  (40 mL) at 0 °C. After 10 min, a solution of benzoyl chloride (9.14 g, 65.0 mmol) in  $\text{CH}_2\text{Cl}_2$  (40 mL) was added dropwise to the mixture at 0 °C. After 1 h, the mixture was stirred at 25 °C for 24 h. Then,  $\text{H}_2\text{O}$  (150 mL) was added to the reaction mixture at 0 °C, and the organic layer was collected. The aqueous layer was extracted with  $\text{CH}_2\text{Cl}_2$  (20 mL  $\times$  2). The combined organic layers were washed with 0.1

M HCl aq (150 mL × 2 ) and brine (150 mL). The combined organic layer was dried over Na<sub>2</sub>SO<sub>4</sub> and concentrated to yield crude **3-4**. The crude product was purified on silica gel column chromatography (hexane/EtOAc = 5/1, v/v) using Wakogel C-400HG (280 g) and recrystallization in hexane (4.44g, yield: 30.0%).

<sup>1</sup>H NMR spectrum (400 MHz, CDCl<sub>3</sub>, 25 °C): δ/ppm 8.09-8.07 (2H, m), 7.55-7.59 (1H, m), 7.49-7.42 (4H, m), 7.38-7.29 (3H, m), 6.93 (1H, s, CCH), 6.45 (1H, s, CH=), 5.97 (1H, t, *J* = 1.07Hz, CH=), 3.73 (3H, s, OCH<sub>3</sub>),

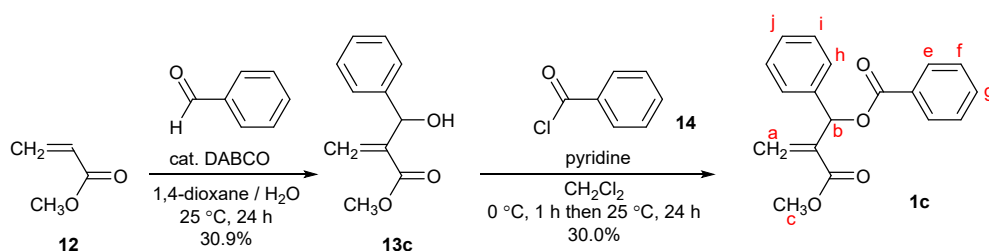

Scheme S2. Preparation of **1c**.

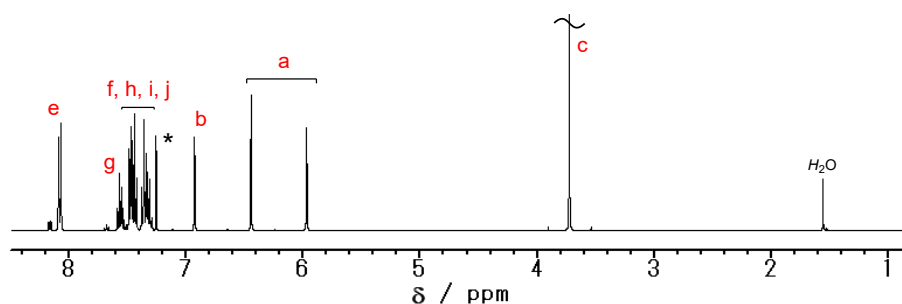

Fig. S2. <sup>1</sup>H NMR spectrum of **1c** (400 MHz, CDCl<sub>3</sub>, 25 °C). Labels for assignments are corresponding to Scheme 1.

**Model experiment:** A typical procedure is shown (Table 1, Entry 4). A solution of benzyl mercaptan (**6**, 8.1 mg, 0.072 mmol) in CDCl<sub>3</sub> (0.5 mL) was added to a solution of **1b** (14 mg, 0.060 mmol) in CDCl<sub>3</sub> (0.2 mL). Then, DABCO (0.22 mg, 0.020 mmol) was added to the mixture at 25 °C. The reaction mixture was analysed by <sup>1</sup>H NMR spectroscopy.

**Polymerization:** A typical procedure is shown (Table 2, Entry 2). A solution of 1,10-decanedithiol (**2**, 0.155 g, 0.750 mmol) in CH<sub>3</sub>CN (0.55 mL) and a solution of DABCO (0.101 g, 0.900 mmol) in CH<sub>3</sub>CN (0.20 mL) was added to **1c** (0.222 g, 0.750 mmol). After 1 h, Bu<sub>3</sub>P (0.0304 g, 0.150 mmol) was added to the reaction mixture. After 24 h, the reaction mixture was poured into CH<sub>3</sub>OH (30 mL). The precipitate was collected by centrifugation and dried in vacuo to afford a polymer (7.8 mg, 27%).

**Degradation of 4c:** A typical procedure is shown. A solution of DBU (6.3 mg, 0.041 mmol) in DMF (1.0 mL) was added to **4c** (Entry 7, *M<sub>n</sub>* = 5600, *D* = 2.10, 12.6 mg, 0.0331 mmol for the repeating unit). After 17 h, small portion of reaction mixtures was sampled to monitor by <sup>1</sup>H NMR spectrometry and SEC.

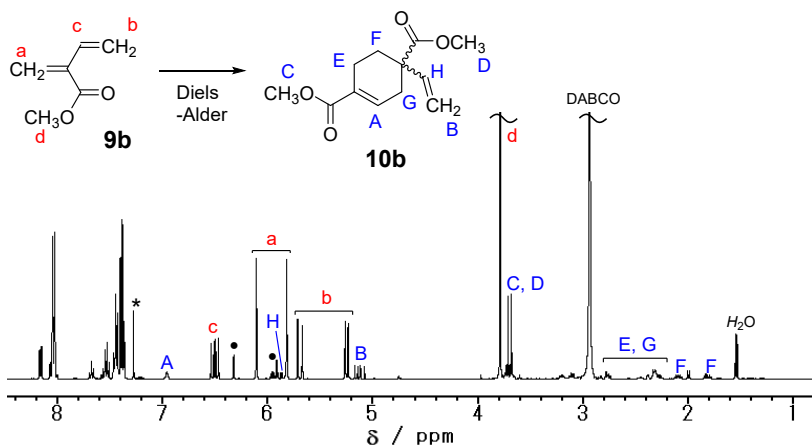

Fig. S3. <sup>1</sup>H NMR spectrum in Table 1, Entry 2. (400 MHz, CDCl<sub>3</sub>, 25 °C). \*: CHCl<sub>3</sub>

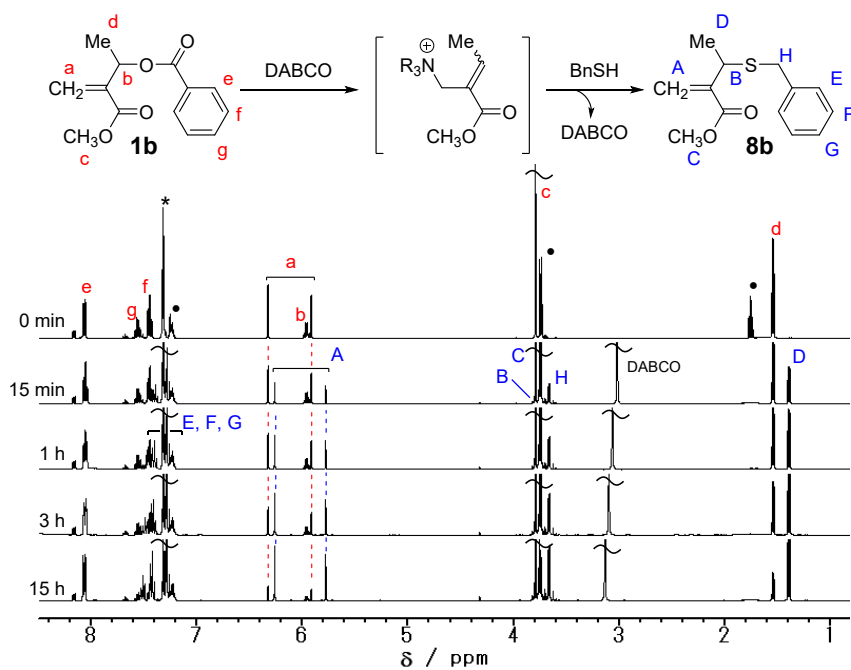

Fig. S4. <sup>1</sup>H NMR spectral changes in Table 1, Entry 3 at each time (400 MHz, CDCl<sub>3</sub>, 25 °C, \*: CHCl<sub>3</sub>, ●: **6**)

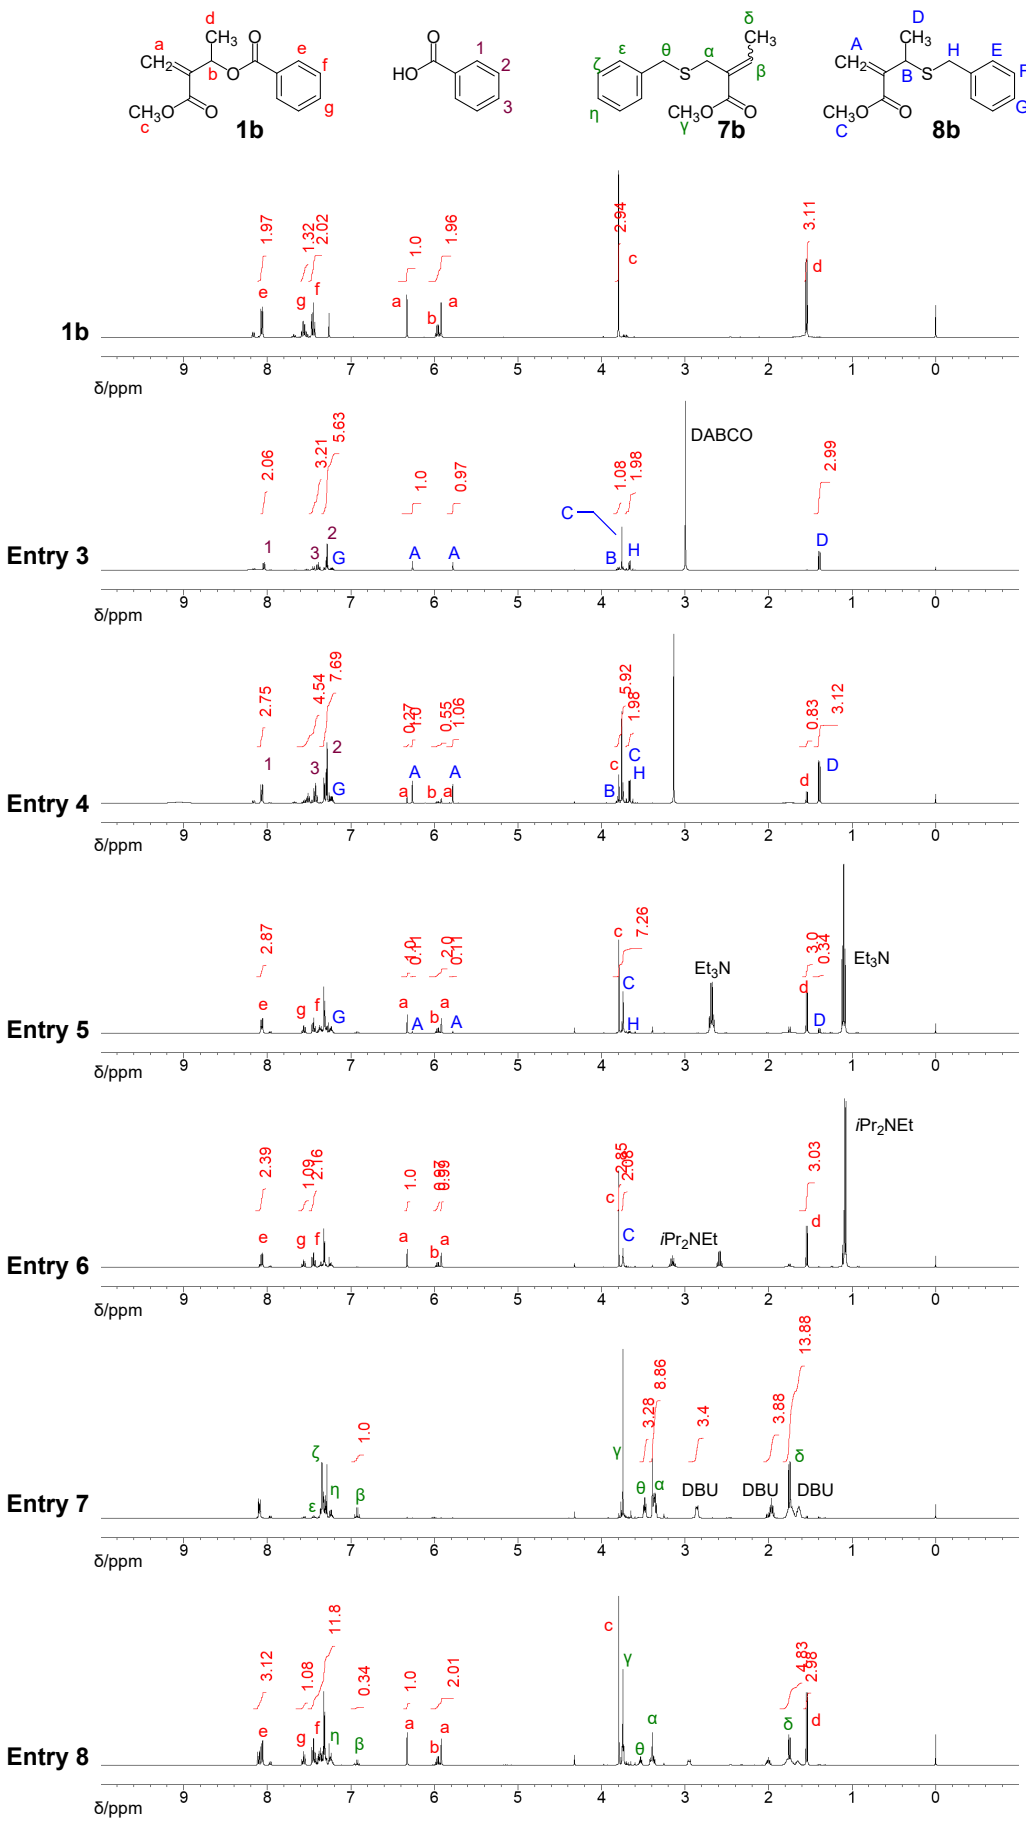

Fig. S5. <sup>1</sup>H NMR spectra of **1b** and the reaction mixture in Entries 3–8 in Table 1 (400 MHz, CDCl<sub>3</sub>, 25 °C).

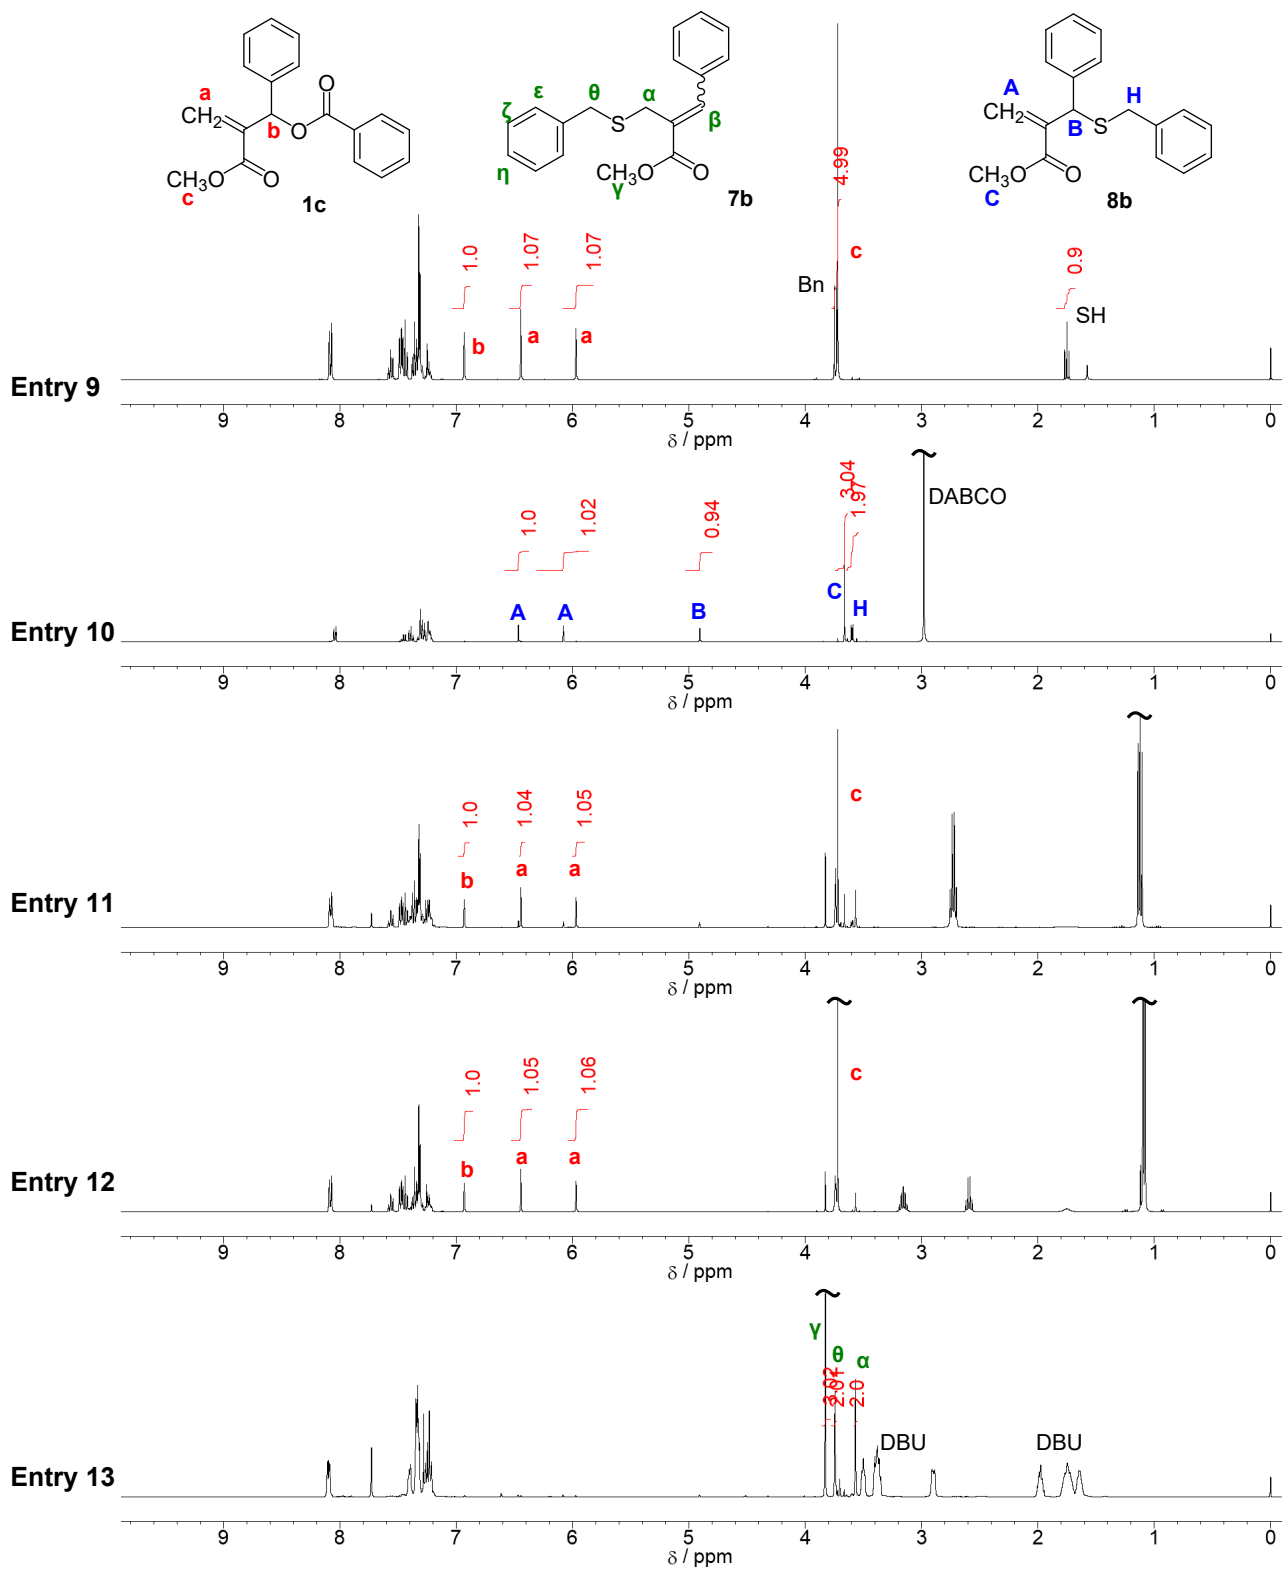

Fig. S6.  $^1\text{H}$  NMR spectra of **1b** and the reaction mixture in Entries 9–13 in Table 1 (400 MHz,  $\text{CDCl}_3$ , 25  $^\circ\text{C}$ ).

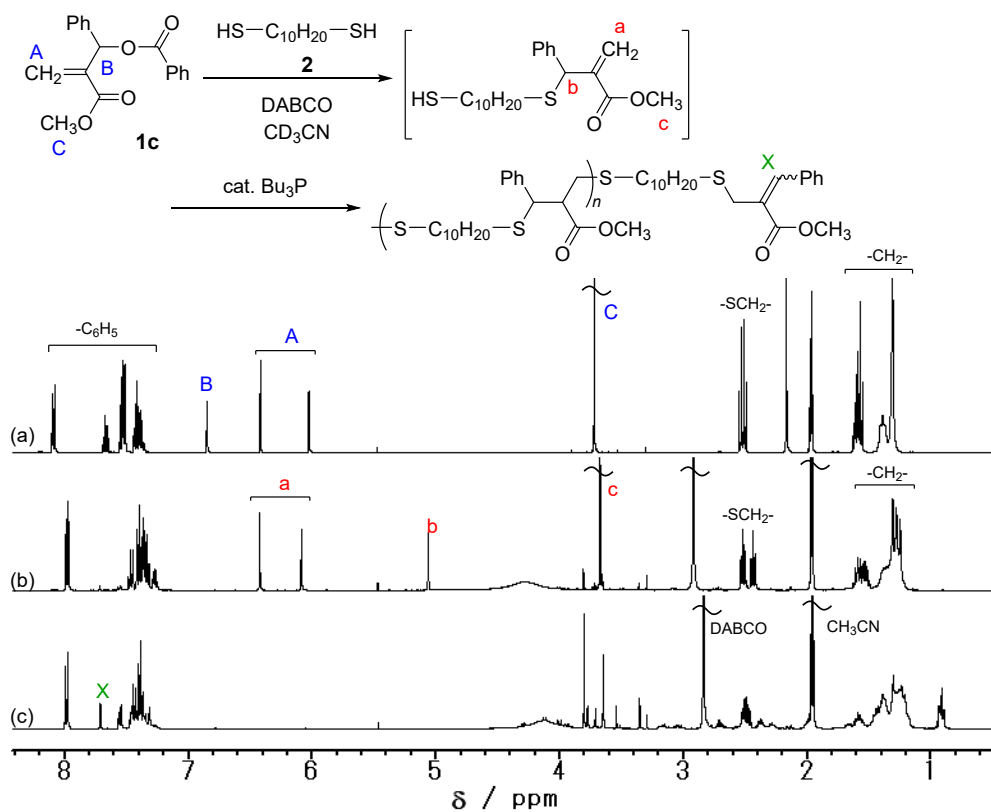

Fig. S7. <sup>1</sup>H NMR spectra of the reaction mixture of **1c**, **2**, DABCO and PBu<sub>3</sub> (a) before adding DABCO, (b) 1 h after adding DABCO and (c) 16 h after adding PBu<sub>3</sub>. (400 MHz, CD<sub>3</sub>CN, 25 °C).

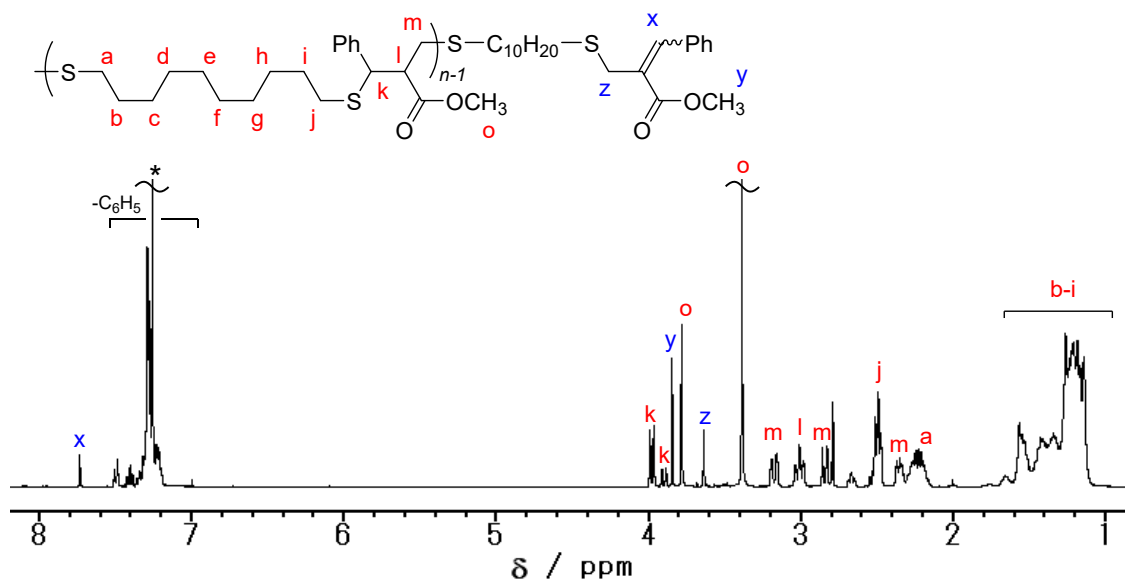

Fig. S8. <sup>1</sup>H NMR spectrum of the product in Entry 6 (400 MHz, CDCl<sub>3</sub>, 25 °C) \*:CHCl<sub>3</sub>

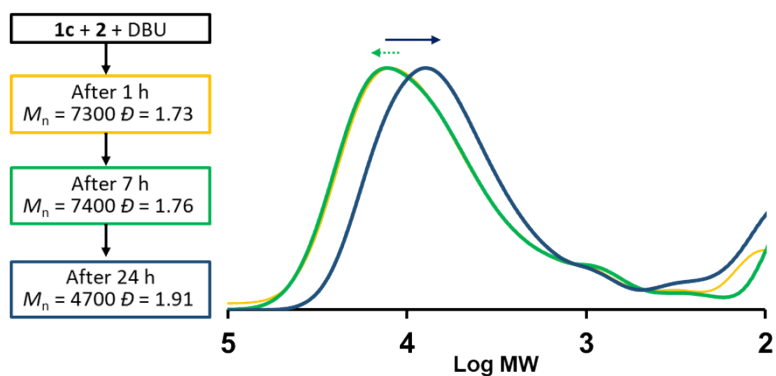

Fig. S9. Time-dependent SEC trace of polycondensation of **1c** and **2** with DBU.

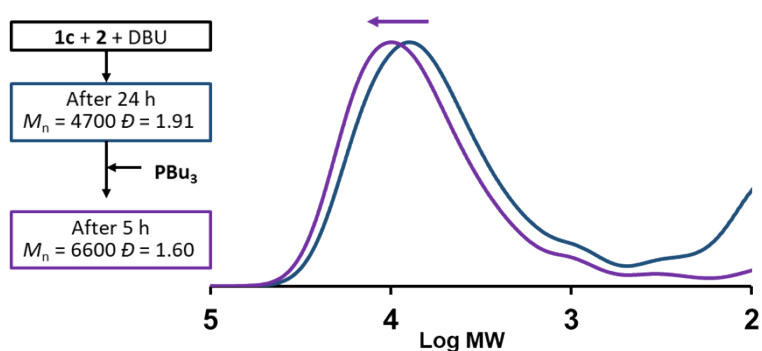

Fig. S10. Time-dependent SEC trace of polycondensation of **1c** and **2** with DBU for 24 h, and then,  $\text{Bu}_3\text{P}$  for 5 h.

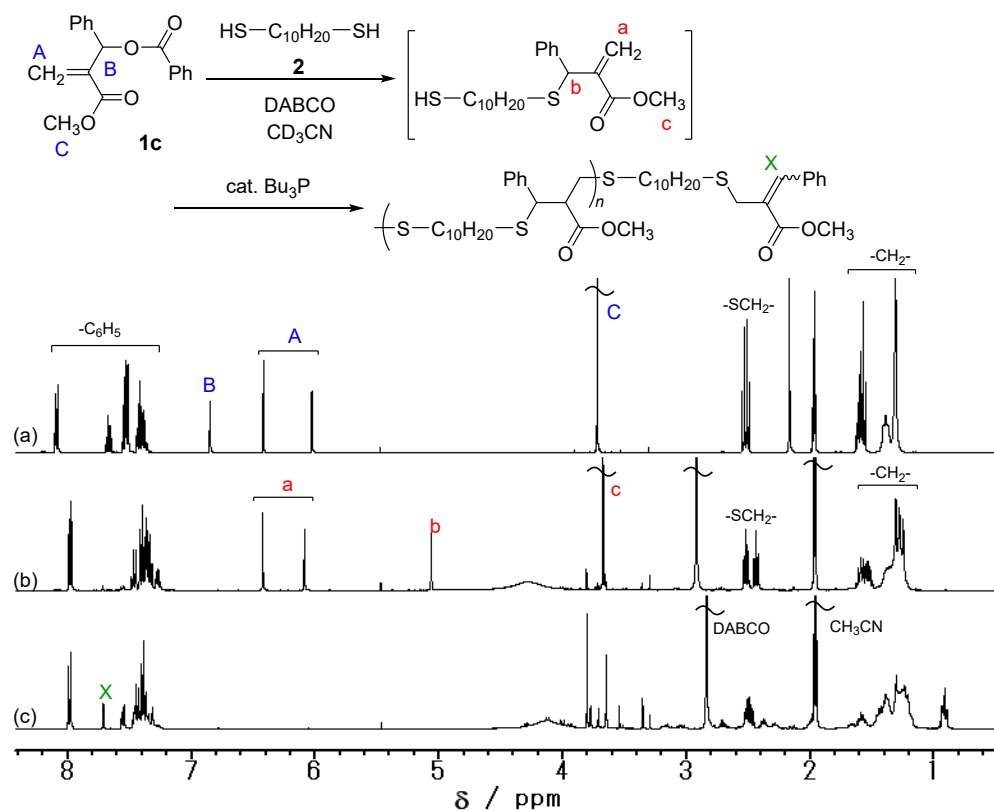



Fig. S11.  $^1\text{H}$  NMR spectra of the reaction mixture of **1c**, **2**, DABCO and  $\text{PBU}_3$  (a) before adding DABCO, (b) 1 h after adding DABCO and (c) 16 h after adding  $\text{PBU}_3$ . (400 MHz,  $\text{CD}_3\text{CN}$ , 25  $^\circ\text{C}$ ).

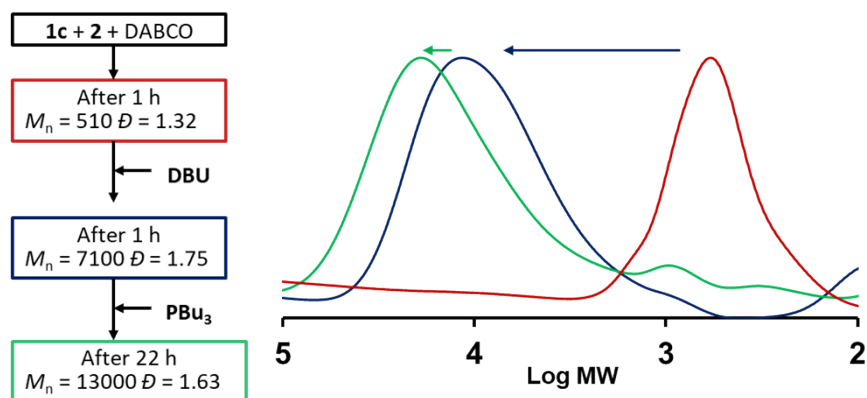

Fig. S12. Time-dependent SEC trace of polycondensation of **1c** and **2** with DABCO for 1 h, and then, DBU for 1 h, followed by  $\text{PBU}_3$  for 22 h.

## Reference

- 1 G. Poklukar, M. Stephan and B. Mohar, *Adv. Synth. Catal.*, 2018, **360**, 2566.
